# Supplementary material for: SIRT3 deacetylase activity confers chemoresistance in AML via regulation of mitochondrial oxidative phosphorylation
Source: PubMed Central journal article supplement (PMC6790595; doi:10.1111/bjh.16044), 2019-06-24

**Supplementary Figure 1.**

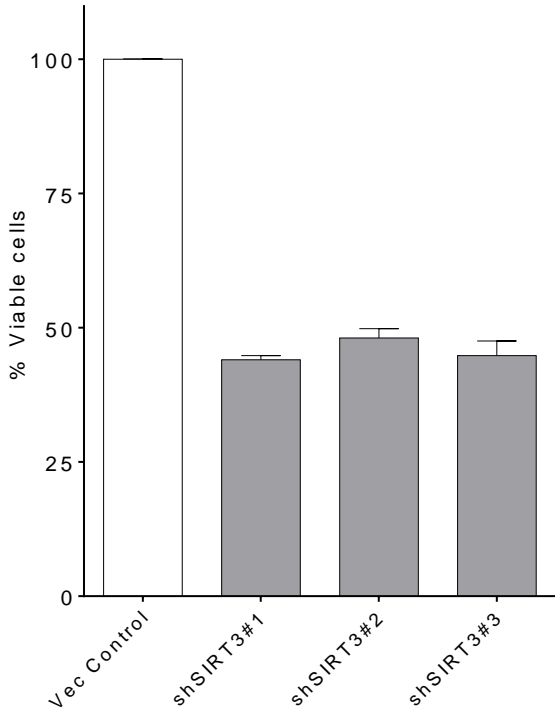

**Supplementary Figure 2.**

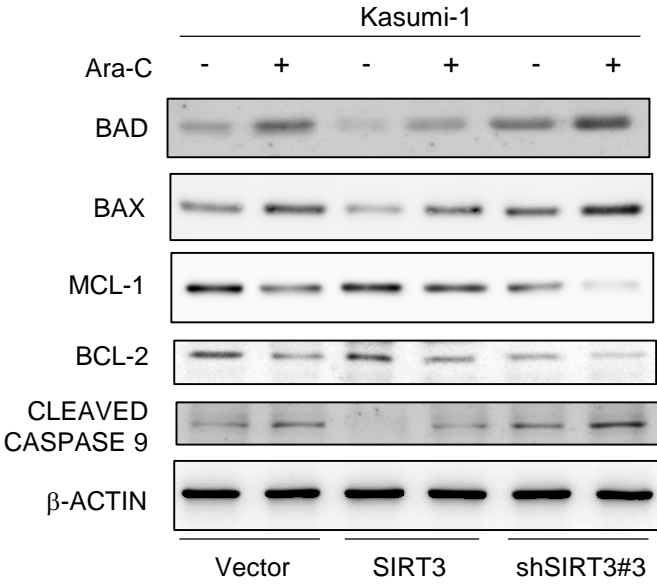

Supplement: BJH-187-49-s001.pdf [file BJH-187-49-s001.pdf]
